# Supplementary material for: Optical Clearing in the Kidney Reveals Potassium-Mediated Tubule Remodeling
Source: PubMed Central journal article supplement — Cell Rep. Author manuscript; Available in PMC 2019 Jan 19. (PMC6339512; doi:10.1016/j.celrep.2018.11.021), 2018-12-04

**Cell Reports, Volume 25**

**Supplemental Information**

**Optical Clearing in the Kidney Reveals**

**Potassium-Mediated Tubule Remodeling**

**Turgay Saritas, Victor G. Puelles, Xiao-Tong Su, James A. McCormick, Paul A. Welling, and David H. Ellison**

## **Inventory of Supplemental Information**

**Figure S1.** Related to Figure 1. Segment-specific localization of Ki-67<sup>+</sup> cells in thin kidney sections.

**Figure S2.** Related to Figure 1. Segment-specific localization of BrdU<sup>+</sup> cells in thin kidney sections.

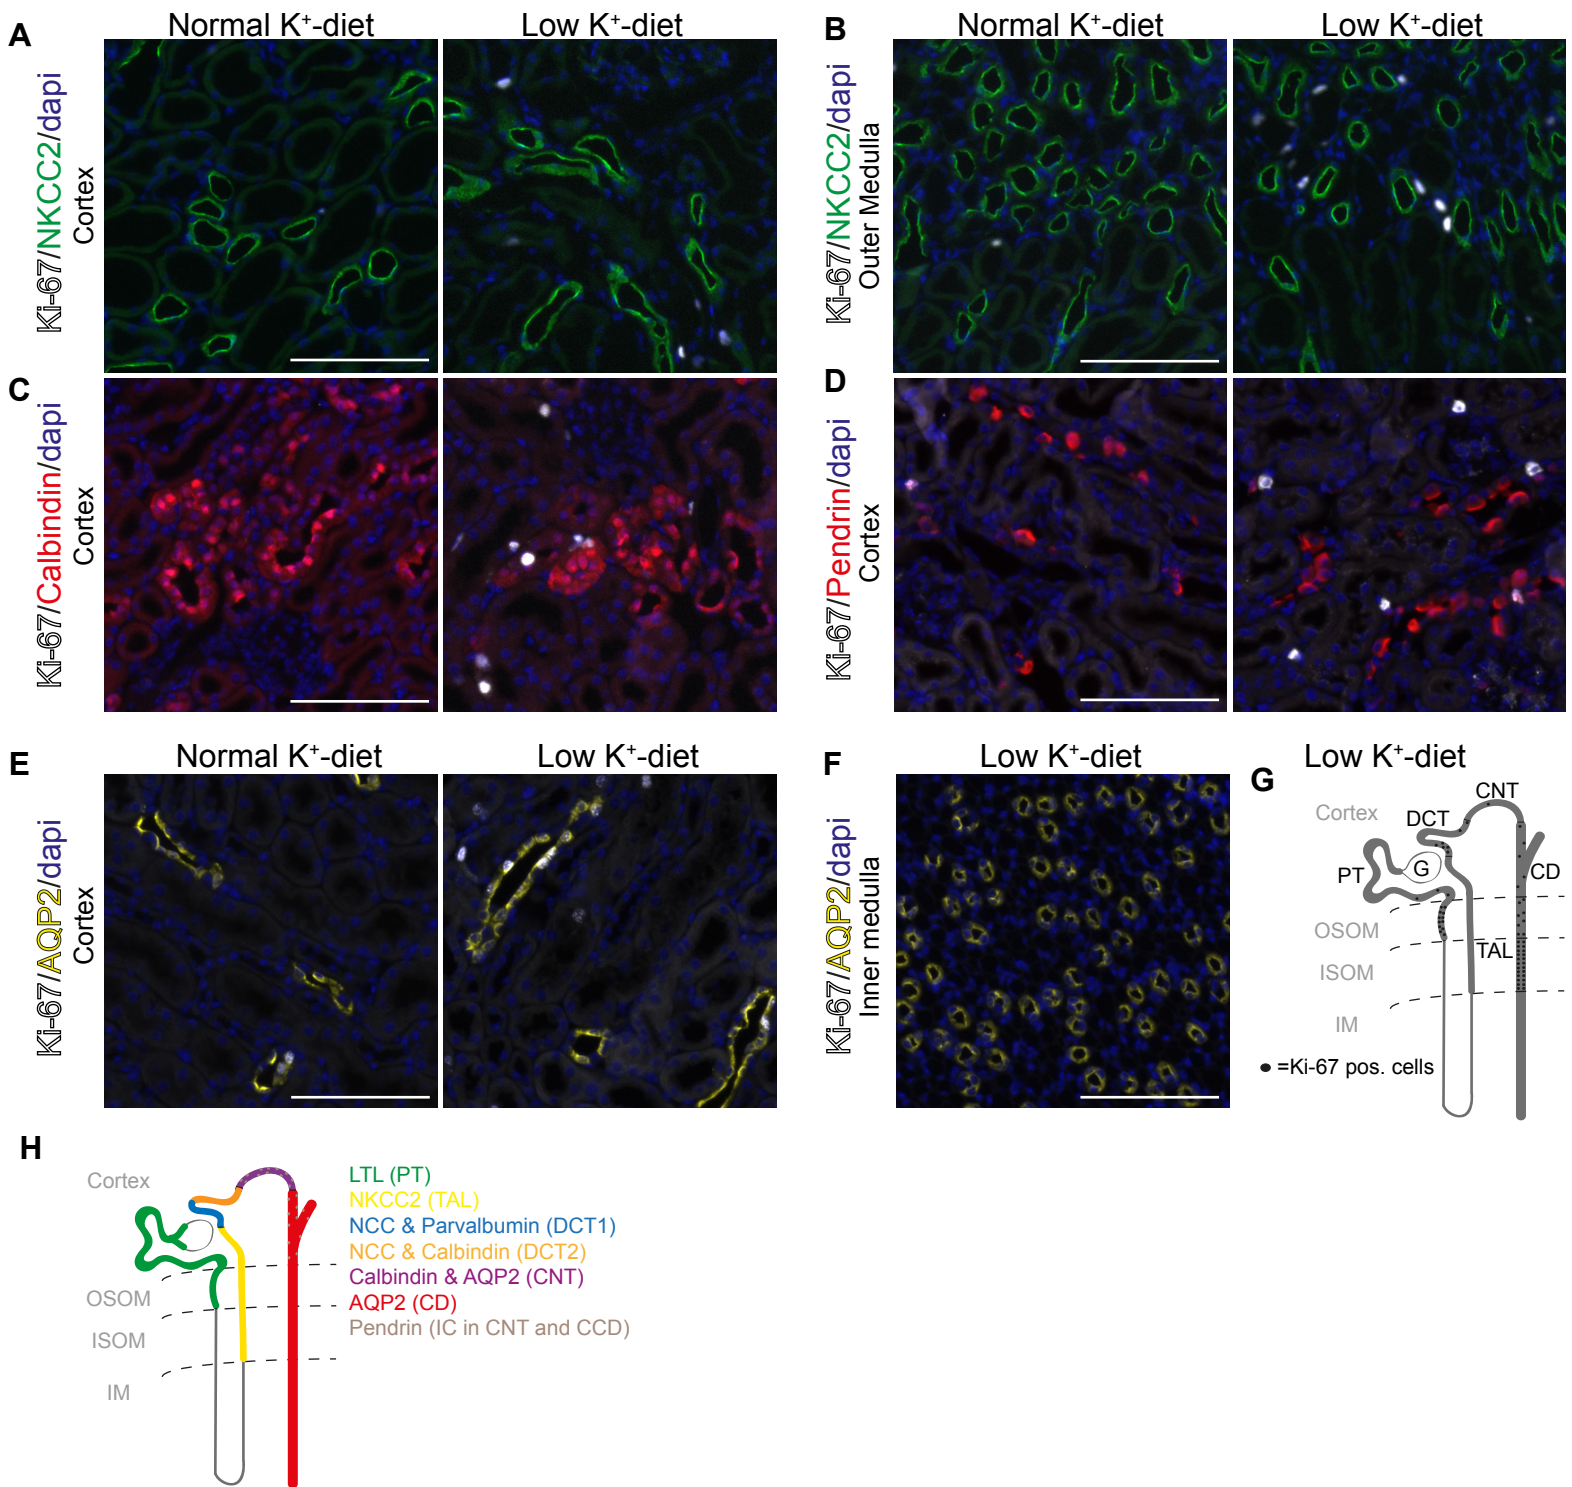

**Figure S1. Related to Figure 1. Segment-specific localization of Ki-67<sup>+</sup> cells in thin kidney sections. A-D:** No or only few Ki-67<sup>+</sup> cells were found in cortical or medullary NKCC2<sup>+</sup> thick ascending limb of henle (TAL), calbindin<sup>+</sup> distal convoluted tubule (DCT2)/connecting tubule (CNT) or pendrin<sup>+</sup> intercalated cells (IC). **E, F:** Ki-67<sup>+</sup> cells were observed in AQP2<sup>+</sup> cortical collecting duct (CCD), but not in inner medulla. **G:** Summary of low K<sup>+</sup>-induced segment-specific proliferation based on Ki-67 immunolabeling. **H:** Scheme of the investigated tubule segments: Lotus Tetragonolobus Lectin (LTL) was used to label brush borders specific for proximal tubules (PT). PT reabsorbs salt, water and organic solutes and secretes ammonium into the lumen. Antibody against sodium-potassium-chloride-contransporter 2 (NKCC2) was used to label TAL, which is relevant for salt reabsorption. Sodium-Chloride-cotransporter (NCC) is specifically expressed in entire DCT, whereas parvalbumin and calbindin are expressed in DCT1 and DCT2, respectively. DCT1 and 2 play a differential role in ion transport. Calbindin is also expressed in CNT. Pendrin is expressed in IC in CNT and CCD, where it is involved in bicarbonate secretion. Aquaporin-2 (AQP2) is expressed in CNT and collecting duct (CD), and both segments are involved in urine concentration and electrolyte transport. *n* = 6-7 mice.

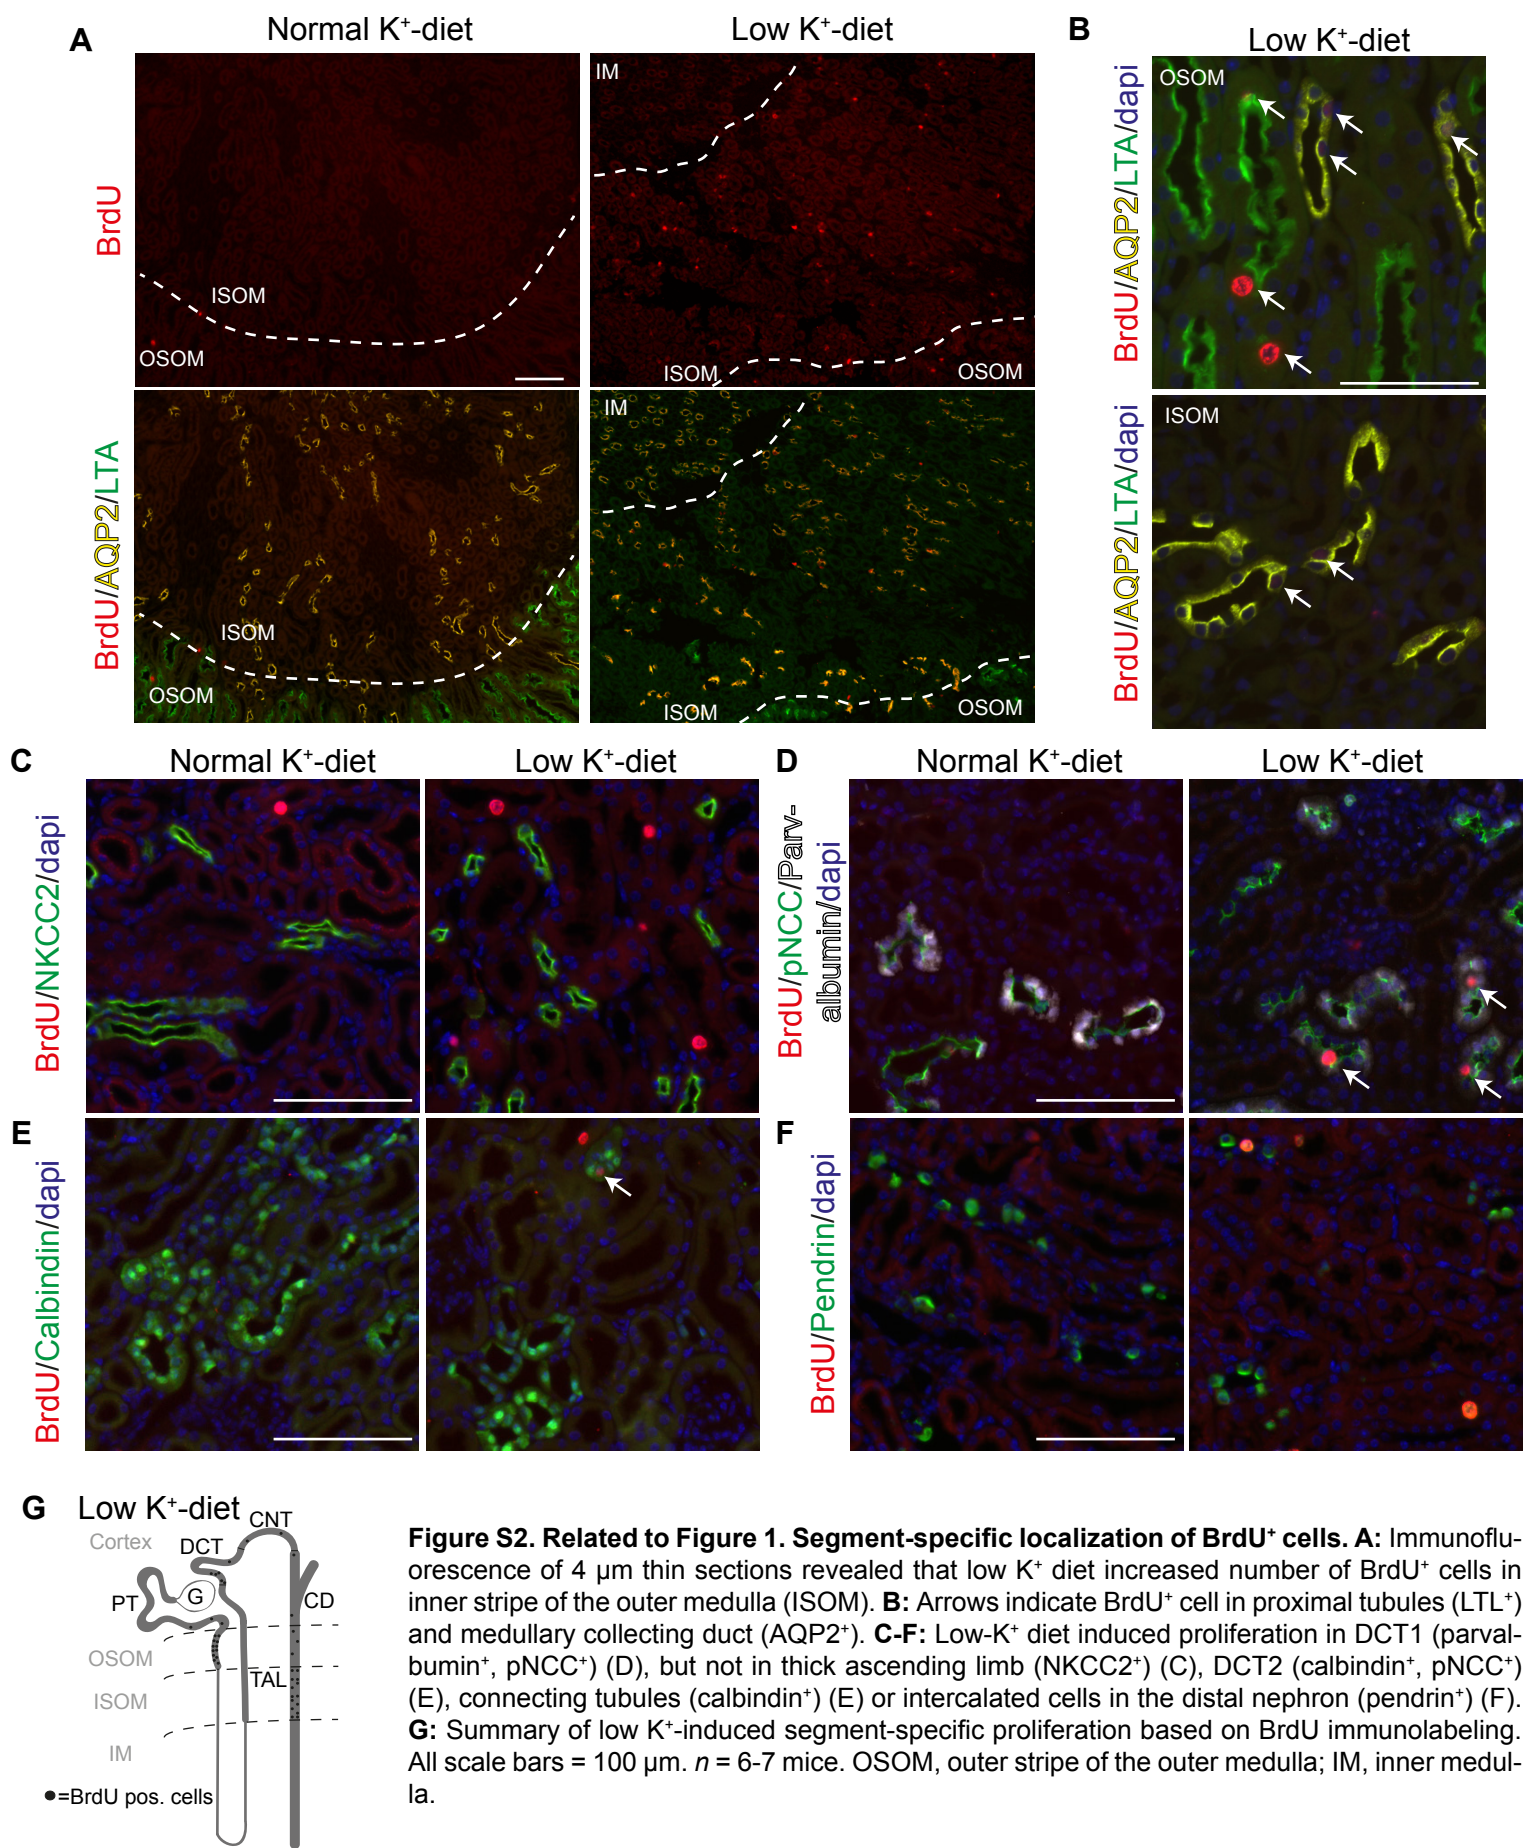

Supplement: NIHMS1516648-supplement-1.pdf [file NIHMS1516648-supplement-1.pdf]
